# Supplementary material for: One-pot rapid synthesis of core–shell structured NiO@TiO2 nanopowders and their excellent electrochemical properties as anode materials for lithium ion batteries
Source: Royal Society of Chemistry journal article supplement (doi:10.1039/c3nr04406h), 2013-01-01
Supplement: c3nr04406h.pdf [file c3nr04406h.pdf]

## Supporting Information

# One-pot Rapid Synthesis of Core-Shell Structured NiO@TiO<sub>2</sub> Nanopowders and Their Excellent Electrochemical Properties for Anode Materials in Lithium Ion Batteries

Seung Ho Choi,<sup>a</sup> Jong-Heun Lee<sup>b</sup> and Yun Chan Kang<sup>\*a</sup>

[\*] Prof. Y.C. Kang

<sup>a</sup>Department of Chemical Engineering, Konkuk University, 1 Hwayang-dong, Gwangjin-gu, Seoul 143-701, Korea. E-mail: [yckang@konkuk.ac.kr](mailto:yckang@konkuk.ac.kr); Fax: +82-2-458-3504; Tel: +82-2-2049-6010

<sup>b</sup>Department of Materials Science and Engineering, Korea University, Anam-Dong, Seongbuk-Gu, Seoul 136-713, Korea. E-mail: [jongheun@korea.ac.kr](mailto:jongheun@korea.ac.kr); Fax: +82-2-928-3584; Tel: +82-2-3290-3282

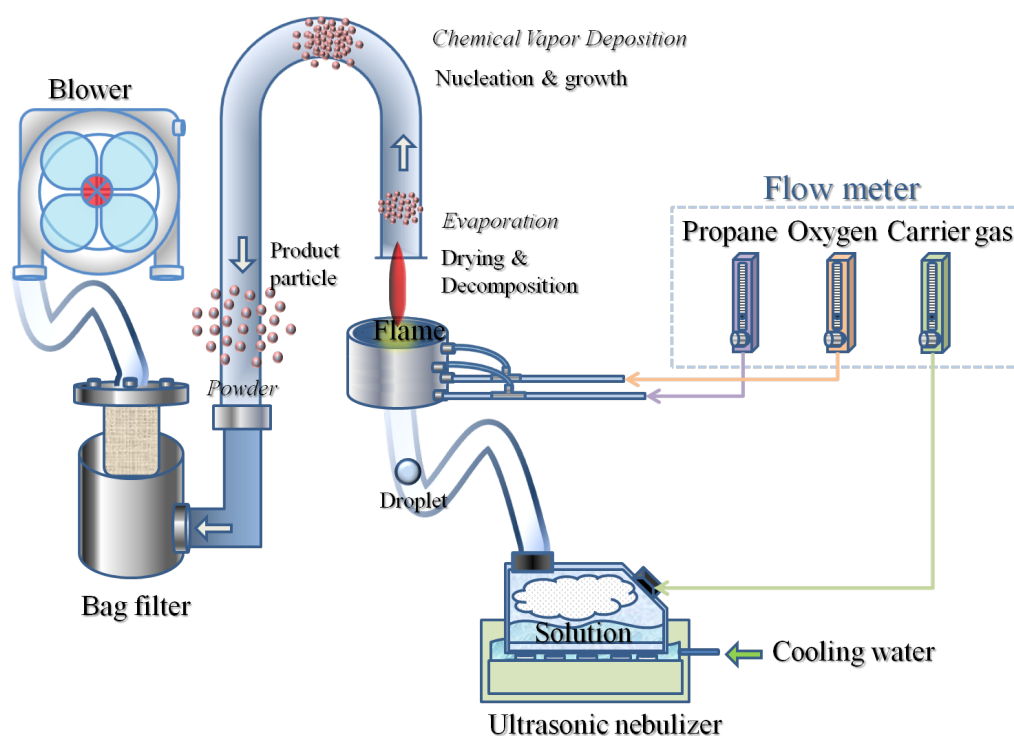

Fig. S1 Schematic diagram of the flame spray pyrolysis process.

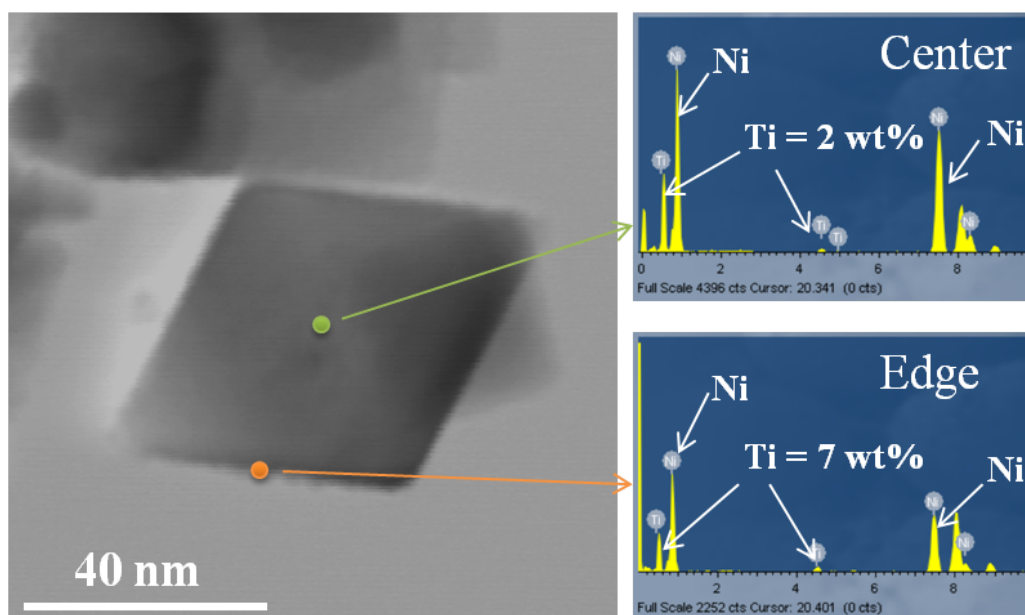

**Fig. S2** TEM image and EDX spectra of the core-shell structured NiO@TiO<sub>2</sub> nanopowders.

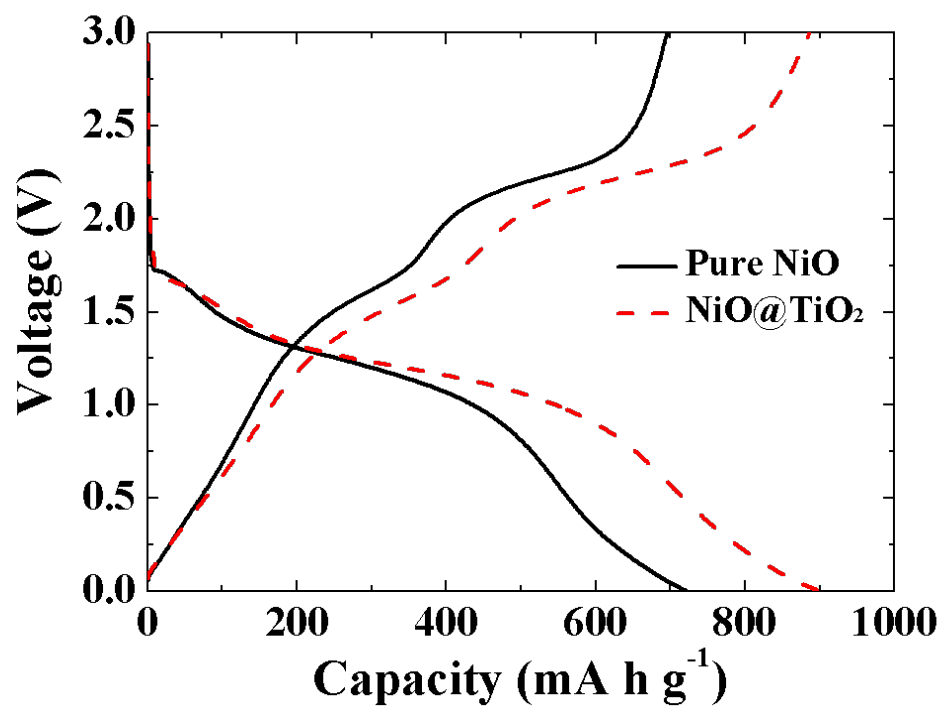

**Fig. S3** Second cycle curves of the pure NiO and NiO@TiO<sub>2</sub> nanopowders.

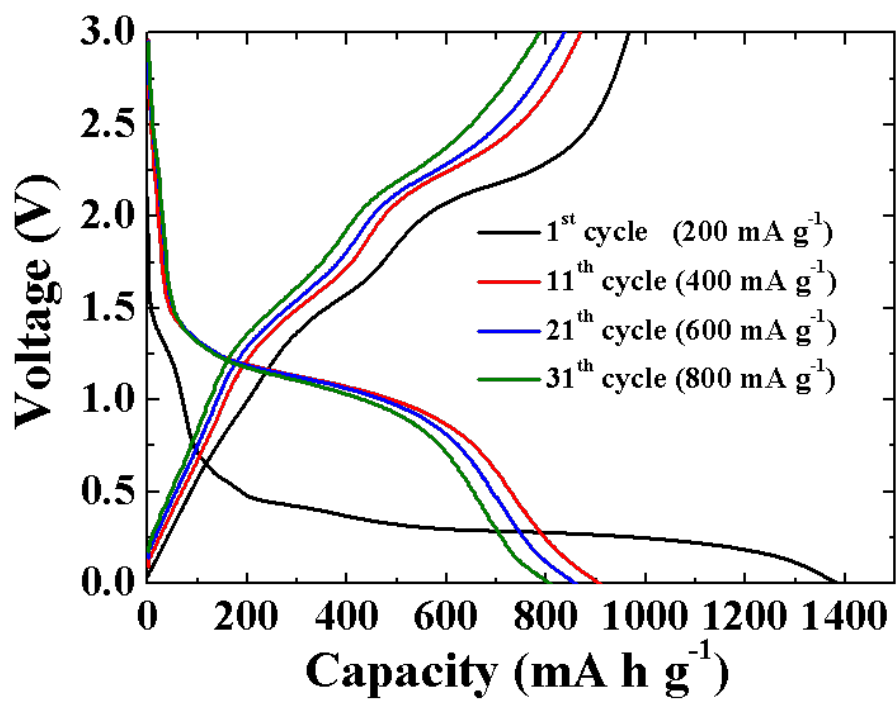

**Fig. S4** Cycle curves of the NiO@TiO<sub>2</sub> nanopowders at different current densities.

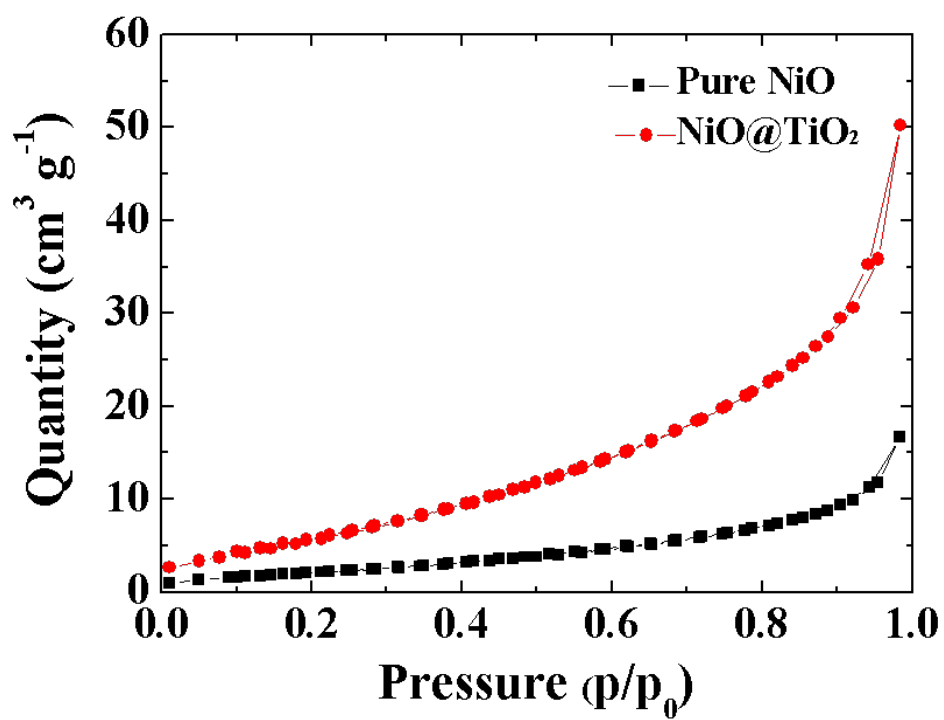

**Fig. S5** N<sub>2</sub> adsorption-desorption isotherms measured at 77 K for the pure NiO and NiO@TiO<sub>2</sub> nanopowders.
